# Supplementary material for: HPLC-MS/MS Monitoring and Health Risk Assessment of Carbosulfan and its Metabolites in Date Palm Fruit (Phoenix dactylifera)
Source: Research Square preprint supplement (doi:10.21203/rs.3.rs-5022517/v1), 2024-11-08
Supplement: Supplementary file 1 [file f24e482b1a2a22e237559f83.xlsx]

## Sheet: Cover Page
HPLC-MS/MS Monitoring and Health Risk Assessment of Carbosulfan and its Metabolites in Date Palm Fruit (Phoenix dactylifera)
Rana Morsi1, Kelani Ghoudi2, Basant Elabyad1, Zaina Kadoura1, Hind Zeidane1, Bayan Al-Meetani3, and Mohammed A. Meetani1*
Supplementary Tables Captions
Table S1: Concentraion (𝜇g/kg) of carbosulfan and its metabolites in 1 g date.
Table S2: MS/MS parameters for carbosulfan, its metabolites, and the internal standard.
Supplementary Figures Captions
Figure S1: Metabolic pathway of carbosulfan.
Figure S2: HQ due to residual levels of a) carbosulfan; b) carbofuran; c) 3-hydroxycarbofuran; and d) 3-ketocarbofuran in date samples for adults.
Figure S3: HQ due to residual levels of a) carbosulfan; b) carbofuran; c) 3-hydroxycarbofuran; and d) 3-ketocarbofuran in date samples for children.

## Sheet: Supplementary Table S1
Table S1: Concentraion (𝜇g/kg) of carbosulfan and its metabolites in 1 g date.
	Carbosulfan	Dibutylamine	Carbofuran	Carbofuran-3-hydroxy	Carbofuran-3-keto
Sample 1	7.149 ± 0.008		0.596 ± 0.013
Sample 2	10.937 ± 0.049	6.493 ± 0.092			0.264 ± 0.001
Sample 3	10.669 ± 0.292		0.435 ± 0.003	1.423 ± 0.046
Sample 4	3.246 ± 0.145			1.061 ± 0.001
Sample 5	6.325 ± 0.086	7.017 ± 0.010	0.164 ± 0.002	1.632 ± 0.008	0.165 ± 0.001
Sample 6	12.606 ± 0.066	5.016 ± 0.108	1.142 ± 0.047
Sample 7	13.077 ± 0.040	5.459 ± 0.030	0.192 ± 0.006
Sample 8	14.401 ± 0.050	7.148 ± 0.224	0.309 ± 0.022		0.346 ± 0.002
Sample 9	6.604 ± 0.219		4.284 ± 0.145
Sample 10	5.317 ± 0.010	6.765 ± 0.054	0.969 ± 0.006		0.248 ± 0.002
Sample 11	11.702 ± 0.188	13.857 ± 0.102	0.165 ± 0.001	2.641 ± 0.112	0.248 ± 0.017
Sample 12	18.985 ± 0.130	4.841 ± 0.144	0.095 ± 0.002	0.773 ± 0.008	0.133 ± 0.001
Sample 13	12.875 ± 0.106	6.679 ± 0.059	0.315 ± 0.020		0.260 ± 0.019
Sample 14	9.099 ± 0.189	9.307 ± 0.174	3.457 ± 0.203		0.267 ± 0.010
Sample 15	23.225 ± 0.254	8.425 ± 0.185	1.097 ±0.003	4.132 ± 0.035	0.596 ±0.008
Sample 16	3.861 ± 0.119	15.201 ± 0.053	0.303 ± 0.012		0.405 ± 0.008
Sample 17	3.497 ± 0.007		0.430 ±0.004	4.099 ± 0.135	0.500 ± 0.006
Sample 18	9.517 ± 0.016			2.597 ± 0.089	0.322 ± 0.001
Sample 19	4.134 ± 0.002	0.270 ± 0.002		7.816 ± 0.056	0.436 ± 0.006
Sample 20	24.524 ± 0.127		1.024 ± 0.007	0.460 ± 0.061	1.011 ± 0.004
Sample 21	4.949 ± 0.074	11.296 ± 0.152	0.259 ± 0.032		0.301 ± 0.003
Sample 22	16.722 ± 0.115	21.818 ± 0.069	0.858 ± 0.153		1.008 ± 0.005
Sample 23	9.317 ± 0.177	5.394 ± 0.070	0.329 ± 0.006	11.401 ± 0.216	0.608 ± 0.020
Sample 24	4.557 ± 0.187	6.183 ± 0.078	0.970 ± 0.026		0.417 ± 0.012
Sample 25	5.265 ± 0.034	7.669 ± 0.107	1.076 ± 0.006	4.774 ± 0.106	0.548 ± 0.004
Sample 26	5.403 ± 0.196	5.963 ± 0.255	0.360 ± 0.012		0.221 ± 0.005
Sample 27	1.283 ± 0.016	11.267 ± 0.119	0.715 ± 0.052	3.502 ± 0.102	0.452 ± 0.007
Sample 28	14.860 ± 0.038	17.950 ± 0.080	0.494 ± 0.054	13.622 ± 0.226	0.603 ± 0.009
Sample 29	10.331 ± 0.057		0.191 ± 0.009	7.675 ± 0.130	0.385 ± 0.004
Sample 30	2.386 ± 0.148	6.871 ± 0.160	0.254 ± 0.037		0.151 ± 0.008
Sample 31	4.630 ± 0.015	3.006 ± 0.011	0.245 ± 0.004	0.587 ± 0.003
Sample 32	6.256 ± 0.171	6.704 ± 0.120	0.787 ± 0.015	2.543 ± 0.180	0.602 ± 0.011
Sample 33	3.584 ± 0.080	8.146 ± 0.089	0.109 ± 0.006		0.182 ± 0.001
Sample 34	12.988 ± 0.193			8.089 ± 0.153	0.154 ± 0.002
Sample 35	7.363 ± 0.076	6.047 ± 0.062		1.015 ± 0.019	0.305 ± 0.057
Sample 36	2.177 ± 0.018	6.538 ± 0.069	1.286 ± 0.008		0.228 ± 0.001
Sample 37	5.927 ± 0.041	3.006 ± 0.024		0.804 ± 0.013	0.292 ± 0.001
Sample 38	12.613 ± 0.081	45.647 ± 0.101		2.222 ± 0.064	0.411 ± 0.009
Sample 39	2.935 ± 0.024	6.136 ± 0.090	0.063 ± 0.001		0.181 ± 0.029
Sample 40	15.589 ± 0.299	5.573 ± 0.234	0.073 ± 0.025		0.305 ± 0.002
Sample 41	4.977 ± 0.066	10.345 ± 0.253	0.122 ± 0.031	0.528 ± 0.035	0.351 ± 0.010
Sample 42	14.242 ± 0.157	9.565 ± 0.011	0.220 ± 0.018		0.191 ± 0.012
Sample 43	27.389 ± 0.018	7.576 ± 0.291	0.282 ± 0.015	1.095 ± 0.018	0.272 ± 0.008
Sample 44	3.543 ± 0.018	12.139 ± 0.052	0.223 ± 0.005		0.282 ± 0.002
Sample 45	11.669 ± 0.261	6.254 ± 0.075		9.328 ± 0.026	0.471 ± 0.007
Sample 46	23.678 ± 0.202	5.275 ± 0.202	0.305 ± 0.004		0.236 ± 0.002
Sample 47	4.527 ± 0.008	4.643 ± 0.384	1.416 ± 0.068	0.568 ± 0.004	0.252 ± 0.001
Sample 48	10.818 ± 0.049	11.540 ± 0.053	0.103 ± 0.003		0.177 ± 0.002
Sample 49	11.429 ± 0.349	11.871 ± 0.061	0.231 ± 0.007		0.543 ± 0.016
Sample 50	14.105 ± 0.194	8.544 ± 0.021	0.273 ± 0.002		0.250 ± 0.001

## Sheet: Supplementary Table S2
Table S2: MS/MS parameters for carbosulfan, its metabolites, and the internal standard.
Analyte	Precursor ion (M+H)+	Product ion 1 (m/z)	Collision energy (eV)	Product ion 2 (m/z)	Collision energy (eV)	Product ion 3 (m/z)	Collision energy (eV)
Carbosulfan	381.1	118	21	160.1	15	76.05	34
Dibutylamine	130.15	57.05	17	41	23	74.05	15
Carbofuran	221.95	165.05	11	123	22	55	28
3-Hydroxycarbofuran	238.15	163.05	14	181.05	11	220.1	6
3-Ketocarbofuran	236.15	179	12	161	17	151.05	15
Carbofuran d3	225	165.05	12	123	21	55	28

## Sheet: Supplementary Figure S1
Figure S1: Metabolic pathway of carbosulfan.

## Sheet: Supplementary Figure S2
Figure S2: HQ due to residual levels of a) carbosulfan; b) carbofuran; c) 3-hydroxycarbofuran; and d) 3-ketocarbofuran in date samples for adults.

## Sheet: Supplementary Figure S3
Figure S3: HQ due to residual levels of a) carbosulfan; b) carbofuran; c) 3-hydroxycarbofuran; and d) 3-ketocarbofuran in date samples for children.
